# Supplementary material for: Utilization of Localized Surface Plasmon Resonance of Silver Nanoparticles for the Spectrofluorimetric Estimation of Oxymetazoline in Dosage Forms: Application to Aqueous Humor
Source: Research Square preprint supplement (doi:10.21203/rs.3.rs-551590/v1), 2021-07-07
Supplement: Supplementary file 1 [file 0c1d630e11f34dc8c0169649.pdf]

**Table (1) Analytical performance data for the determination of OMZ by the proposed method.**

| <b>Parameter</b>                                     | <b>Value</b>                 |
|------------------------------------------------------|------------------------------|
| <b>Wavelength (nm)</b>                               | 281/306 nm                   |
| <b>Linearity range</b>                               | 20.0-700.0<br><b>(ng/mL)</b> |
| <b>Intercept (<i>a</i>)</b>                          | -2.5646                      |
| <b>Slope (<i>b</i>)</b>                              | 1.2704                       |
| <b>Correlation coefficient (<i>r</i>)</b>            | 0.9999                       |
| <b>S.D. of residuals (<i>S<sub>y/x</sub></i>)</b>    | 3.632                        |
| <b>S.D. of intercept (<i>S<sub>a</sub></i>)</b>      | 1.796                        |
| <b>S.D. of slope (<i>S<sub>b</sub></i>)</b>          | 0.005                        |
| <b>Percentage relative standard deviation, % RSD</b> | 1.461                        |
| <b>Percentage relative error, % Error</b>            | 0.516                        |
| <b>LOD</b>                                           | 5.0<br><b>(ng/mL)</b>        |
| <b>LOQ</b>                                           | 14.0<br><b>(ng/mL)</b>       |

$$LOQ = 10 S_a / b$$

$$LOD = 3.3 S_a / b$$

Where;

$S_a$  = standard deviation of the intercept of the calibration curve.

$b$  = slope of the calibration curve.

**Table (2) Application of the proposed method for the determination of OMZ in raw material.**

| <b>Parameters</b>                 | <b>Amount taken (ng/mL)</b>        | <b>Amount found (ng/mL)</b> | <b>Percentage found*</b> |
|-----------------------------------|------------------------------------|-----------------------------|--------------------------|
|                                   | 20.0                               | 20.14                       | 100.70                   |
|                                   | 50.0                               | 50.86                       | 101.72                   |
|                                   | 70.0                               | 68.08                       | 97.26                    |
|                                   | 90.0                               | 89.78                       | 99.76                    |
|                                   | 100.0                              | 98.41                       | 98.41                    |
|                                   | 300.0                              | 301.54                      | 100.51                   |
|                                   | 500.0                              | 505.03                      | 101.00                   |
|                                   | 700.0                              | 696.12                      | 99.45                    |
| <b>Mean(<math>\bar{X}</math>)</b> |                                    |                             | <b>99.85</b>             |
| <b><math>\pm</math>SD</b>         |                                    |                             | <b>1.459</b>             |
| <b>%RSD</b>                       |                                    |                             | <b>1.461</b>             |
| <b>% Error</b>                    |                                    |                             | <b>0.516</b>             |
| <b>N</b>                          | <b>8</b>                           |                             |                          |
| <b>Official method [10]</b>       |                                    |                             |                          |
| <b>Mean<math>\pm</math>S.D</b>    | <b>100.05<math>\pm</math>0.627</b> |                             |                          |
| <b>N</b>                          | <b>3</b>                           |                             |                          |
| <b>t-test</b>                     | <b>0.317 (2.262)</b>               |                             |                          |
| <b>F-value</b>                    | <b>5.415(19.35)</b>                |                             |                          |

*N.B.* \* Mean of three determinations.

The values between parentheses are the tabulated t and F values at  $P = 0.05$ .

**Table (3): Precision data for the determination of OMZ by the proposed method.**

| Parameters |         | 90.0 ng/mL | 300.0 ng/mL | 500.0 ng/mL |
|------------|---------|------------|-------------|-------------|
| Intra- day | Mean    | 99.11      | 101.14      | 100.20      |
|            | ± SD    | ± 0.70     | ± 0.64      | ± 0.97      |
|            | % RSD   | 0.70       | 0.63        | 0.97        |
|            | % Error | 0.41       | 0.37        | 0.56        |
| Inter- day | Mean    | 100.20     | 100.65      | 100.56      |
|            | ± SD    | ±1.05      | ±1.87       | ±2.26       |
|            | % RSD   | 1.04       | 1.86        | 2.25        |
|            | % Error | 0.60       | 1.07        | 1.30        |

*N. B.* Each result is the average of three separate determinations

**Table (4): Robustness evaluation of the proposed method.**

| Variation                        | Recovery | % RSD |
|----------------------------------|----------|-------|
| Volume of AgNPs<br>(0.1 mL±0.02) |          |       |
| 0.08 mL                          | 100.72   | 1.67  |
| 0.1 mL                           | 99.82    | 1.54  |
| 0.12 mL                          | 99.27    | 1.27  |

**Table (5): Effect of some related drugs on the fluorometric determination of OMZ (500 ng/mL).**

| <b>Drug</b>                  | <b>Tolerance limit (<math>\mu\text{g/mL}</math>)</b> |
|------------------------------|------------------------------------------------------|
| Xylometazoline hydrochloride | <b>10</b>                                            |
| triamcinolone acetonide      | <b>31</b>                                            |
| cromolyn sodium              | <b>9</b>                                             |

**Table (6): Determination of OMZ in pharmaceutical preparations using the proposed method.**

| <i>Parameters</i>                                          | <b>Proposed method</b>      |                             |                                     | <b>Official method [10]</b> |                             |                                     |
|------------------------------------------------------------|-----------------------------|-----------------------------|-------------------------------------|-----------------------------|-----------------------------|-------------------------------------|
|                                                            | <b>Amount taken (ng/mL)</b> | <b>Amount found (ng/mL)</b> | <b>Percentage found<sup>a</sup></b> | <b>Amount taken (µg/mL)</b> | <b>Amount found (µg/mL)</b> | <b>Percentage found<sup>a</sup></b> |
| <b>Oxymet<sup>®</sup> drops<br/>OMZ (0.5 mg/mL)</b>        | 100.0                       | 101.00                      | 101                                 | 60.0                        | 60.56                       | 100.93                              |
|                                                            | 300.0                       | 295.40                      | 98.46                               | 100.0                       | 98.96                       | 98.96                               |
|                                                            | 500.0                       | 503.30                      | 100.66                              | 140.0                       | 140.51                      | 100.36                              |
| <b>Mean</b>                                                |                             |                             | 100.04                              |                             |                             | 100.08                              |
| <b>± S.D.</b>                                              |                             |                             | 1.38                                |                             |                             | 1.01                                |
| <b>% RSD</b>                                               |                             |                             | 1.38                                |                             |                             | 1.01                                |
| <b>% Error</b>                                             |                             |                             | 0.80                                |                             |                             | 0.59                                |
| <b><i>T</i></b>                                            | 0.04 (2.776) *              |                             |                                     |                             |                             |                                     |
| <b><i>F</i></b>                                            | 1.87 (19.00) *              |                             |                                     |                             |                             |                                     |
| <b>Oxymetazoline<sup>®</sup> spray<br/>OMZ (0.5 mg/mL)</b> | 100.0                       | 99.66                       | 99.66                               | 60.0                        | 59.10                       | 98.50                               |
|                                                            | 300.0                       | 304.96                      | 101.65                              | 100.0                       | 101.69                      | 101.69                              |
|                                                            | 500.0                       | 501.64                      | 100.33                              | 140.0                       | 139.18                      | 99.41                               |
| <b>Mean</b>                                                |                             |                             | 100.55                              |                             |                             | 99.87                               |
| <b>± S.D.</b>                                              |                             |                             | 1.02                                |                             |                             | 1.64                                |
| <b>% RSD</b>                                               |                             |                             | 1.01                                |                             |                             | 1.64                                |
| <b>% Error</b>                                             |                             |                             | 0.58                                |                             |                             | 0.95                                |
| <b><i>t</i></b>                                            | 0.61 (2.776) *              |                             |                                     |                             |                             |                                     |
| <b><i>F</i></b>                                            | 2.59 (19.00) *              |                             |                                     |                             |                             |                                     |

*N.B.* <sup>a</sup> Mean of three determinations.

\*The values between parentheses are the tabulated t and F values at  $P = 0.05$ .

**Table (7): Content uniformity testing of OMZ in (Oxymet<sup>®</sup> nasal drops).**

| <b>Drop no(test)</b>                         | <b>conc taken (ng/ml)</b> | <b>conc found (ng/ml)</b> | <b>A = (OMZ conc found per each drop / conc taken) x100</b> |
|----------------------------------------------|---------------------------|---------------------------|-------------------------------------------------------------|
| <b>1</b>                                     | 500                       | 489.5                     | 97.90%                                                      |
| <b>2</b>                                     | 500                       | 480                       | 96.00%                                                      |
| <b>3</b>                                     | 500                       | 504                       | 100.80%                                                     |
| <b>4</b>                                     | 500                       | 499                       | 99.80%                                                      |
| <b>5</b>                                     | 500                       | 497                       | 99.40%                                                      |
| <b>6</b>                                     | 500                       | 510                       | 102.00%                                                     |
| <b>7</b>                                     | 500                       | 510                       | 102.00%                                                     |
| <b>8</b>                                     | 500                       | 490                       | 98.00%                                                      |
| <b>9</b>                                     | 500                       | 508                       | 101.60%                                                     |
| <b>10</b>                                    | 500                       | 480                       | 96.00%                                                      |
| <b>total=993.5%</b>                          |                           |                           |                                                             |
| <b>x̄ (mean)=99.35 %</b>                     |                           |                           |                                                             |
| <b>S (sample standard deviation) =2.304%</b> |                           |                           |                                                             |
| <b>k (Acceptability constant) =2.4</b>       |                           |                           |                                                             |
| <b>Ks = 5.5296%</b>                          |                           |                           |                                                             |
| <b>M (Reference value) = 99.35%</b>          |                           |                           |                                                             |
| <b>AV (acceptance value) = 5.5296%</b>       |                           |                           |                                                             |

**Table (8): Application of the proposed spectrofluorimetric method for determination of OMZ in aqueous humor.**

| <i>Parameter</i>     | <b>Proposed method</b>          |                                 |                         |
|----------------------|---------------------------------|---------------------------------|-------------------------|
|                      | <b>Amount taken<br/>(ng/mL)</b> | <b>Amount found<br/>(ng/mL)</b> | <b>Percentage found</b> |
| <b>Aqueous humor</b> | 20.0                            | 19.96                           | 99.8                    |
|                      | 40.0                            | 40.22                           | 100.55                  |
|                      | 50.0                            | 50.39                           | 100.78                  |
|                      | 80.0                            | 78.64                           | 98.3                    |
|                      | 100.0                           | 100.82                          | 100.82                  |
| <b>Mean</b>          |                                 |                                 | 100.05                  |
| <b>± S.D.</b>        |                                 |                                 | 1.06                    |
| <b>% RSD</b>         |                                 |                                 | 1.06                    |
| <b>% Error</b>       |                                 |                                 | 0.47                    |
